# Supplementary material for: A comparison between TOPSIS and SAW methods
Source: Springer Nature journal article supplement (doi:10.1007/s10479-023-05339-w), 2023-05-10
Supplement: 10479_2023_5339_MOESM1_ESM.pdf [file 10479_2023_5339_MOESM1_ESM.pdf]

# Supplementary Information for the paper entitled: A comparison between TOPSIS and SAW methods.

Francesco Ciardiello<sup>1\*</sup> and Andrea Genovese<sup>2</sup>

<sup>1\*</sup>Department of Economics and Statistics, University of Salerno,  
Via Papa Paolo Giovanni II, Salerno, 84084, Campania, Italy.

<sup>2</sup>Management School, The University of Sheffield, Conduit Road,  
Sheffield, S101FL, South Yorkshire, United Kingdom.

\*Corresponding author(s). E-mail(s): [fcardiello@unisa.it](mailto:fcardiello@unisa.it);  
Contributing authors: [a.genovese@shef.ac.uk](mailto:a.genovese@shef.ac.uk);

Numerical results of similarities indices obtained after simulated experiments. The results are presented in three appendices and each of them is devoted to a specific distance utilised in TOPSIS methods. The number of tables is 27. For each appendix, similarities indices are the ones presented in the official publication. The total number of studied similarity indices is 9.

## Appendix A

The next 6 tables are calculated with TOPSIS being endowed with the Euclidean distance.

|     | 3     | 6     | 9     |
|-----|-------|-------|-------|
| 25  | .9752 | .9482 | .9401 |
| 50  | .9791 | .9600 | .9495 |
| 75  | .9810 | .9626 | .9599 |
| 100 | .9829 | .9665 | .9645 |

**Table 1:** SPE index

2 *Supplementary Information*


---

|     | 3     | 6     | 9     |
|-----|-------|-------|-------|
| 25  | .9467 | .8733 | .8867 |
| 50  | .9445 | .8678 | .8433 |
| 75  | .8933 | .8155 | .7989 |
| 100 | .9075 | .8214 | .7422 |

---

**Table 2:** KE index

---

|     | 3     | 6     | 9     |
|-----|-------|-------|-------|
| 25  | .9793 | .9701 | .9697 |
| 50  | .9911 | .9849 | .9825 |
| 75  | .9944 | .9895 | .9896 |
| 100 | .9955 | .9896 | .9902 |

---

**Table 3:** RS1 index

---

|     | 3     | 6     | 9     |
|-----|-------|-------|-------|
| 25  | .9780 | .9694 | .9682 |
| 50  | .9909 | .9829 | .9797 |
| 75  | .9938 | .9885 | .9879 |
| 100 | .9940 | .9868 | .9873 |

---

**Table 4:** RS2 index

---

|     | 3     | 6     | 9     |
|-----|-------|-------|-------|
| 25  | .4800 | .3600 | .3600 |
| 50  | .4000 | .1600 | .1800 |
| 75  | .1733 | .1467 | .1733 |
| 100 | .1200 | .1200 | .0800 |

---

**Table 5:** RA index

---

|    | 3     | 6     | 9     |
|----|-------|-------|-------|
| 25 | .9791 | .9545 | .9497 |
| 50 | .9807 | .9633 | .9545 |
| 75 | .9821 | .9654 | .9619 |

---

---

|     | 3     | 6     | 9     |
|-----|-------|-------|-------|
| 100 | .9833 | .9679 | .9659 |

---

**Table 6:** WSPE index

---

|     | 3   | 6   | 9   |
|-----|-----|-----|-----|
| 25  | .78 | .76 | .82 |
| 50  | .92 | .78 | .74 |
| 75  | .88 | .80 | .80 |
| 100 | .86 | .64 | .70 |

---

**Table 7:** HR index

---

|     | 3     | 6     | 9     |
|-----|-------|-------|-------|
| 25  | .8750 | .8333 | .8750 |
| 50  | .9796 | .9184 | .8367 |
| 75  | .9730 | .9459 | .9054 |
| 100 | .9394 | .9293 | .7172 |

---

**Table 8:** GHR index

---

|     | 3     | 6     | 9     |
|-----|-------|-------|-------|
| 25  | .8750 | .9167 | .9167 |
| 50  | .9796 | .9592 | .9388 |
| 75  | .9730 | .9595 | .9730 |
| 100 | .9798 | .9495 | .9697 |

---

**Table 9:** WGHR index

## Appendix B

The next 6 tables are calculated with TOPSIS being endowed with the Manhattan distance.

---

|    | 3     | 6     | 9     |
|----|-------|-------|-------|
| 25 | .9932 | .9915 | .9909 |
| 50 | .9965 | .9968 | .9966 |

4 *Supplementary Information*


---

|     | 3     | 6     | 9     |
|-----|-------|-------|-------|
| 75  | .9985 | .9980 | .9975 |
| 100 | .9992 | .9986 | .9983 |

---

**Table 10:** SPE index

---

|     | 3     | 6     | 9     |
|-----|-------|-------|-------|
| 25  | .9800 | .9733 | .9667 |
| 50  | .9886 | .9510 | .9673 |
| 75  | .9683 | .9719 | .9618 |
| 100 | .9842 | .9693 | .9798 |

---

**Table 11:** KE index

---

|     | 3     | 6     | 9     |
|-----|-------|-------|-------|
| 25  | .9933 | .9899 | .9892 |
| 50  | .9961 | .9968 | .9971 |
| 75  | .9996 | .9980 | .9979 |
| 100 | .9995 | .9987 | .9987 |

---

**Table 12:** RS1 index

---

|     | 3     | 6     | 9     |
|-----|-------|-------|-------|
| 25  | .9939 | .9896 | .9894 |
| 50  | .9961 | .9969 | .9970 |
| 75  | .9996 | .9979 | .9980 |
| 100 | .9996 | .9986 | .9986 |

---

**Table 13:** RS2 index

---

|     | 3     | 6     | 9     |
|-----|-------|-------|-------|
| 25  | .7600 | .8800 | .7600 |
| 50  | .7400 | .3600 | .4800 |
| 75  | .4000 | .4533 | .3067 |
| 100 | .4800 | .3300 | .4933 |

---

**Table 14:** RA index

---

|     | 3     | 6     | 9     |
|-----|-------|-------|-------|
| 25  | .9938 | .9925 | .9920 |
| 50  | .9968 | .9969 | .9970 |
| 75  | .9986 | .9981 | .9976 |
| 100 | .9992 | .9986 | .9984 |

---

**Table 15:** WSPE index

---

|     | 3   | 6   | 9   |
|-----|-----|-----|-----|
| 25  | .96 | .90 | .88 |
| 50  | .90 | .96 | .96 |
| 75  | 1   | .94 | .98 |
| 100 | 1   | .94 | .96 |

---

**Table 16:** HR index

---

|     | 3     | 6     | 9     |
|-----|-------|-------|-------|
| 25  | .9167 | .9583 | .9167 |
| 50  | .9592 | .9592 | .9796 |
| 75  | 1     | .9730 | .9865 |
| 100 | 1     | .9798 | .9865 |

---

**Table 17:** GHR index

---

|     | 3     | 6     | 9     |
|-----|-------|-------|-------|
| 25  | .9583 | .9583 | .9583 |
| 50  | .9796 | .9592 | .9796 |
| 75  | 1     | .9865 | .9865 |
| 100 | 1     | .9899 | .9865 |

---

**Table 18:** WGHR index

## Appendix C

The next 5 tables are calculated with TOPSIS being endowed with Tchebychev distance.

---

|     | 3     | 6     | 9     |
|-----|-------|-------|-------|
| 25  | .9307 | .7292 | .5167 |
| 50  | .9358 | .8407 | .7568 |
| 75  | .9298 | .8453 | .7660 |
| 100 | .9246 | .8351 | .7899 |

---

**Table 19:** SPE index

---

|     | 3     | 6     | 9     |
|-----|-------|-------|-------|
| 25  | .8333 | .5800 | .5000 |
| 50  | .7714 | .7127 | .5853 |
| 75  | .7499 | .6281 | .6339 |
| 100 | .7741 | .5705 | .5244 |

---

**Table 20:** KE index

---

|     | 3     | 6     | 9     |
|-----|-------|-------|-------|
| 25  | .9727 | .8845 | .8781 |
| 50  | .9841 | .9587 | .9313 |
| 75  | .9867 | .9685 | .9513 |
| 100 | .9896 | .9753 | .9672 |

---

**Table 21:** RS1 index

---

|     | 3     | 6     | 9     |
|-----|-------|-------|-------|
| 25  | .9740 | .8565 | .8179 |
| 50  | .9791 | .9486 | .9206 |
| 75  | .9838 | .9654 | .9404 |
| 100 | .9871 | .9691 | .9558 |

---

**Table 22:** RS2 index

---

|    | 3     | 6     | 9     |
|----|-------|-------|-------|
| 25 | .2400 | .0800 | .0800 |
| 50 | .1200 | .1400 | .1000 |
| 75 | .0800 | .0133 | .0533 |

---

|                           | 3     | 6     | 9     |
|---------------------------|-------|-------|-------|
| 100                       | .0700 | .0200 | .0200 |
| <b>Table 23:</b> RA index |       |       |       |

---

|                             | 3     | 6     | 9     |
|-----------------------------|-------|-------|-------|
| 25                          | .9424 | .7657 | .6490 |
| 50                          | .9417 | .8538 | .7758 |
| 75                          | .9343 | .8570 | .7818 |
| 100                         | .9277 | .8408 | .7973 |
| <b>Table 24:</b> WSPE index |       |       |       |

---

|                           | 3   | 6   | 9   |
|---------------------------|-----|-----|-----|
| 25                        | .86 | .36 | .44 |
| 50                        | .76 | .62 | .36 |
| 75                        | .70 | .44 | .42 |
| 100                       | .70 | .54 | .54 |
| <b>Table 25:</b> HR index |     |     |     |

---

|                            | 3      | 6      | 9      |
|----------------------------|--------|--------|--------|
| 25                         | 0.875  | 0.25   | 0      |
| 50                         | 0.8367 | 0.6939 | 0.5306 |
| 75                         | 0.9459 | 0.7297 | 0.4459 |
| 100                        | 0.9394 | 0.8586 | 0.6263 |
| <b>Table 26:</b> GHR index |        |        |        |

---

|                             | 3      | 6      | 9      |
|-----------------------------|--------|--------|--------|
| 25                          | 0.875  | 0.7083 | 0.5417 |
| 50                          | 0.9388 | 0.7959 | 0.8163 |
| 75                          | 0.973  | 0.9054 | 0.9054 |
| 100                         | 0.9596 | 0.9495 | 0.9192 |
| <b>Table 27:</b> WGHR index |        |        |        |
